# Supplementary material
Source: PubMed Central journal article supplement (PMC5570650)

**Supplemental Table S1. Characteristics of children with IBMFS and low bone mineral density (BMD HAZ  $\leq$ -2).**

| UPN       | Diagnosis | Age, yrs | Sex | Height Z-score | BMD HAZ                | Treatment                                                 | Transfusion History                       | HSCT                      | Fracture History | Endocrine; Hypogonadism                | Bisphosphonate      |
|-----------|-----------|----------|-----|----------------|------------------------|-----------------------------------------------------------|-------------------------------------------|---------------------------|------------------|----------------------------------------|---------------------|
| NCI 2-1   | DBA       | 14       | M   | -3.24          | FN: -2.39<br>LS: 0.55  | Prednisone x 9 yrs                                        | PRBC x 12 years; iron overload            | No                        | No               | not tested                             | Alendronate x 2 yrs |
| NCI 204-1 | DC        | 12       | M   | -1.15          | FN: -4.27<br>LS: -0.65 | Prednisone high-dose x 1 yr for pulmonary fibrosis        | No                                        | Age 4 yrs; HLA-ID sibling | No               | No                                     | No                  |
| NCI 154-1 | DC        | 15       | M   | -0.71          | FN: -2.01<br>LS: -1.05 | Oxymetholone; Androderm x 1 yr                            | PRBC x 2 years; Iron overload             | No                        | No               | No                                     | No                  |
| NCI 220-1 | DC        | 15       | M   | 0.82           | FN: -2.62<br>LS: -0.31 | None                                                      | None                                      | No                        | No               | No                                     | No                  |
| NCI 194-1 | DC-like*  | 17       | F   | 0.51           | FN: -2.55<br>LS: -2.71 | Oxymetholone x 1 yr; glucocorticoid premedication x 3 yrs | PRBC and platelets x 3 yrs; iron overload | No                        |                  | No                                     | No                  |
| NCI 291-1 | DC        | 19       | M   | -1.6           | FN: -2.17<br>LS: -1.37 | None                                                      | None                                      | No                        | No               | No                                     |                     |
| NCI 285-2 | DC-like*  | 19       | M   | -0.38          | FN: -2.52<br>LS: -0.22 | Prednisolone and oxymetholone x 10 yrs                    | No                                        | No                        | No               | Low testosterone                       | No                  |
| NCI 243-1 | FA        | 13       | M   | -0.21          | FN: -2.00<br>LS: 0.32  | Levothyroxine; growth hormone therapy                     | No                                        | Age 9 yrs; MUD            | No               | Hypothyroid; Growth hormone deficiency | No                  |
| NCI 241-1 | FA        | 16       | M   | -3.2           | FN: -2.04              | Levothyroxine                                             | No                                        | Age 6 yrs; HLA-ID         | No               | Hypogonadism and hypothyroid           | No                  |

|           |     |    |   |       |                        |                                                |    |         |                                              |                             |                        |
|-----------|-----|----|---|-------|------------------------|------------------------------------------------|----|---------|----------------------------------------------|-----------------------------|------------------------|
|           |     |    |   |       | LS: -0.72              |                                                |    | sibling |                                              |                             |                        |
| NCI 75-1  | FA  | 18 | M | -0.89 | FN: -0.76<br>LS: 1.51  | Oxymetholone x 4<br>yrs; prednisone x 5<br>yrs | No | No      | Vertebral<br>compression<br>fractures age 14 | DXA age 14:<br>Osteoporosis | Alendronate x 2<br>yrs |
| NCI 173-1 | SDS | 12 | M | -6.63 | FN: -2.14<br>LS: -0.02 | None                                           | No | No      | No                                           | No                          | No                     |

\*The diagnosis was subsequently changed to DC-like in these 2 patients with very short telomeres because they did not meet the clinical criteria for the diagnosis of DC and no known mutated gene was identified.

FN, femoral neck. LS Lumbar spine. HAZ, height-adjusted Z-score. PRBC, packed red blood cells. HLA-ID, HLA identical HSCT, hematopoietic stem cell transplantation. MUD, matched unrelated donor. UPN, unique patient identifier. NCI, National Cancer Institute

**Supplemental Table S2. Characteristics of adults with IBMFS and low bone mineral density (BMD Z-score  $\leq$ -2).**

| UPN       | Diagnosis | Age | Sex | Height Z-score | BMD Z-score            | Treatment                                                 | Transfusions                     | HSCT                  | Fractures                       | Hypogonadism                        | Bisphosphonate       |
|-----------|-----------|-----|-----|----------------|------------------------|-----------------------------------------------------------|----------------------------------|-----------------------|---------------------------------|-------------------------------------|----------------------|
| NCI 193-5 | DBA       | 26  | M   | -1.37          | FN: -2.0<br>LS: -1.4   | Prednisone X 10+ yrs                                      | PRBC x 26 yrs;<br>iron overload  | No                    | AVN hip                         | Yes                                 |                      |
| NCI 57-1  | DBA       | 30  | F   | -0.52          | FN: -1.4<br>LS: -0.8   | estrogen/progesterone;<br>insulin                         | PRBC x 18+ yrs;<br>iron overload | No                    | No                              | POI                                 | Alendronate x 7 yrs  |
| NCI 167-1 | DC        | 29  | M   | -0.82          | FN: -2.20<br>LS: -3.90 | G-CSF x 2 yrs; AML Rx; insulin for type 1 diabetes 27 yrs | PRBC x 3 yrs;<br>iron overload   | No                    | No                              | No                                  |                      |
| NCI 26-1  | DC        | 29  | M   | -1.93          | FN: NA<br>LS: -2.20    | Warfarin for hyperthrombotic state                        | No                               | No                    | AVN hip                         | No                                  | No                   |
| NCI 9-1   | FA        | 42  | F   | -1.21          | FN: -1.9<br>LS: -4.0   | Prednisone X 10+ years                                    | No                               | No                    | No                              | POI with premature menopause age 34 | No                   |
| NCI 144-1 | FA        | 37  | F   | -3.12          | FN: -1.9<br>LS: -2.4   | Nandronolone                                              | No                               | No                    | No                              | POI with premature menopause age 34 | Alendronate x 2 yrs  |
| NCI 73-2  | FA        | 27  | F   | -2.45          | FN: -1.9<br>LS: -2.5   | None                                                      | No                               | No                    | No                              | POI                                 | No                   |
| NCI 169-1 | FA        | 23  | F   | -2.5           | LS: -4.7:<br>FN: -4.5  | None                                                      | No                               | Age 7; HLA-ID sibling | vertebral compression fractures | POI                                 | Alendronate x 2 yrs  |
| NCI 7-1   | FA        | 52  | F   | -1.4           | FN: -0.7               | Estrogen x 15 yrs                                         | No                               | No                    | No                              | Premature menopause age 35          | Alendronate x 10 yrs |

|  |  |  |  |  |           |  |  |  |  |  |  |
|--|--|--|--|--|-----------|--|--|--|--|--|--|
|  |  |  |  |  | LS: -0.2; |  |  |  |  |  |  |
|--|--|--|--|--|-----------|--|--|--|--|--|--|

FN, femoral neck. LS Lumbar spine. HAZ, height-adjusted Z-score. PRBC, packed red blood cells. HLA-ID, HLA identical. HSCT, hematopoietic stem cell transplantation. MUD, matched unrelated donor. UPN, unique patient identifier. NCI, National Cancer Institute

Supplemental Figure S1: Correlation of spine and femoral neck BMD Z-score and BMaD with height in adults with IBMFS

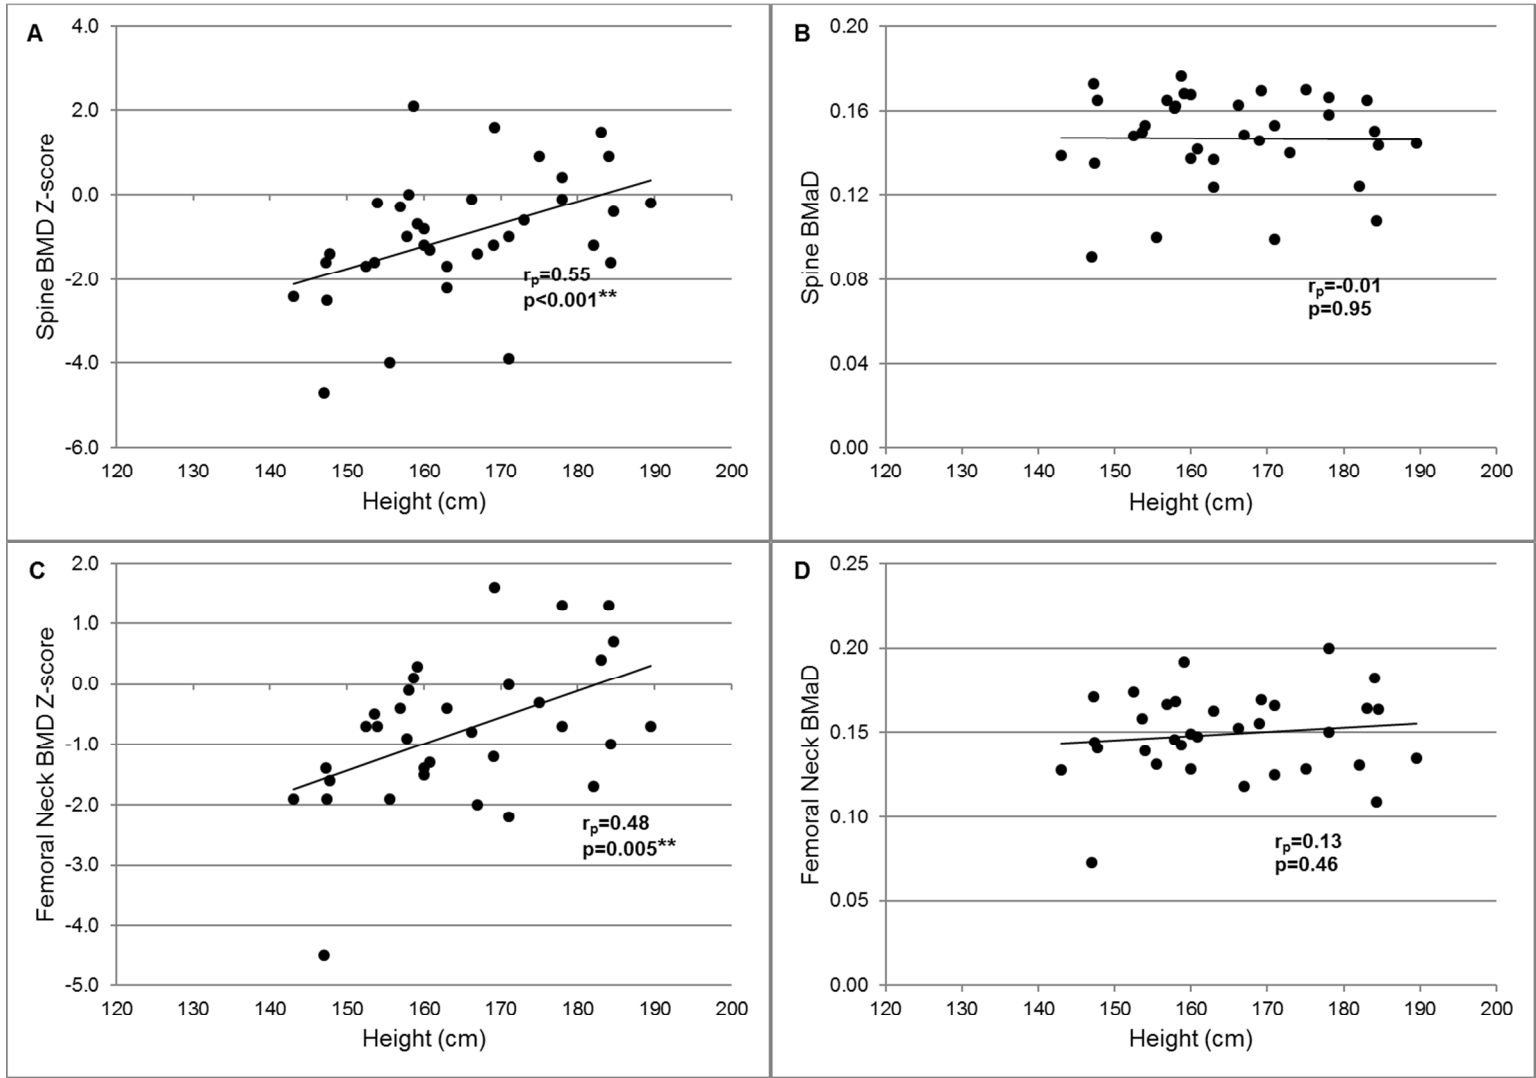

Supplement: NIHMS873909-supplement-supplement_1.pdf [file NIHMS873909-supplement-supplement_1.pdf]
